# Supplementary material for: Boronate-modified polyethyleneimine dendrimer as a solid-phase extraction adsorbent for the analysis of luteolin via HPLC
Source: Royal Society of Chemistry journal article supplement (doi:10.1039/d1ra07564k), 2021-01-01
Supplement: d1ra07564k1.pdf [file d1ra07564k1.pdf]

## Support Information

### Boronate-modified polyethyleneimine dendrimer as solid-phase extraction adsorbent for the analysis of luteolin via HPLC

Baoyue Zhang<sup>1#</sup>, Yukui Tong<sup>1#</sup>, Jiangua He<sup>2</sup>, Baodong Sun<sup>3</sup>, Feng Zhang<sup>1\*</sup>, Miaomiao Tian<sup>1\*</sup>

*1 Key Laboratory of Photochemical Biomaterials and Energy Storage Materials, Heilongjiang Province, College of Chemistry and Chemical Engineering, Harbin Normal University, Harbin 150025, P. R. China.*

*2 Ruyuan Hec Pharm Co., Ltd. Guangdong Province, Shaoguan 512700, P. R. China.*

*3 Key Laboratory for Photonic and Electronic Bandgap Materials, Ministry of Education, Harbin Normal University, Harbin, 150025, China.*

*Corresponding authors: E-mail: Zhangfeng@hrbnu.edu.cn (F. Zhang); mmttqqq@163.com (M.M. Tian).*

*# These authors contributed equally in this work.*

#### The XRD patterns of obtained nanomaterials

The XRD patterns of PS@PDA@PEI-Ag and PPEI-Ag@CPBA in Fig. S4 show that five typical diffraction peaks of Ag ( $2\theta = 38.12^\circ, 44.28^\circ, 64.43^\circ, 77.47^\circ, \text{ and } 81.54^\circ$ ) can be observed. The peak positions at the corresponding  $2\theta$  values are denoted as (111), (200), (220), (311), and (222), respectively. It shows that the crystal structure of Ag modified by CPBA is well maintained.

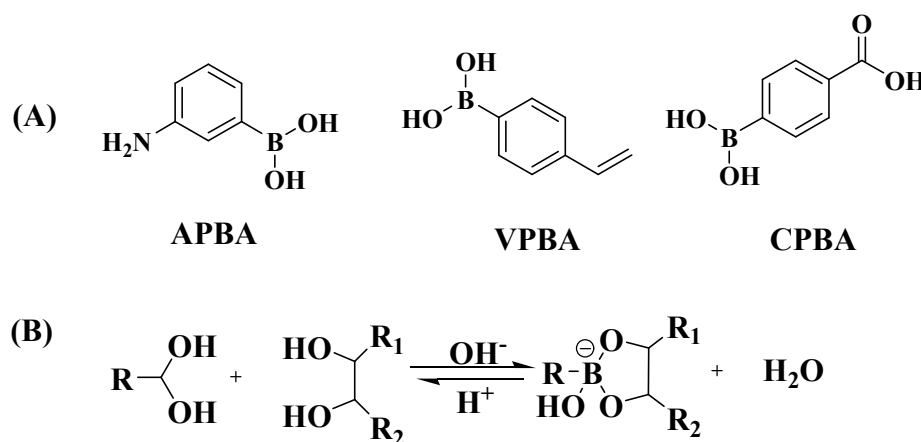

**Fig. S1** The structure of APBA, VPBA, and CPBA (A); Mechanism of boronate affinity (B).

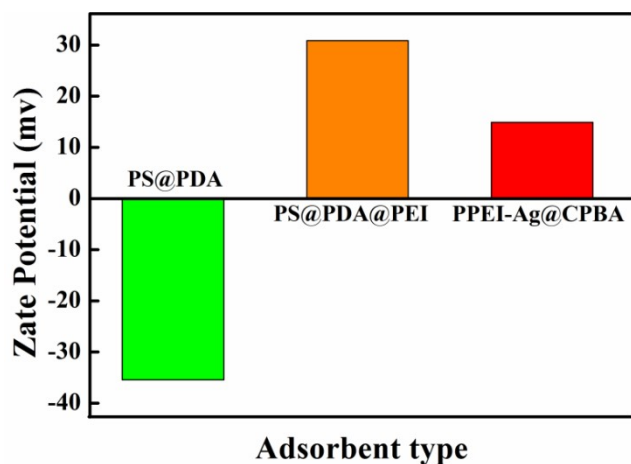

Fig. S2 The zeta potentials of PS@PDA, PS@PDA@PEI, and PPEI-Ag@CPBA.

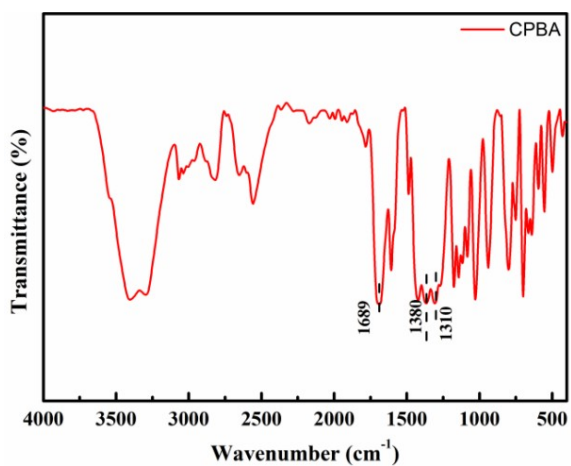

Fig. S3 FT-IR spectra of CPBA.

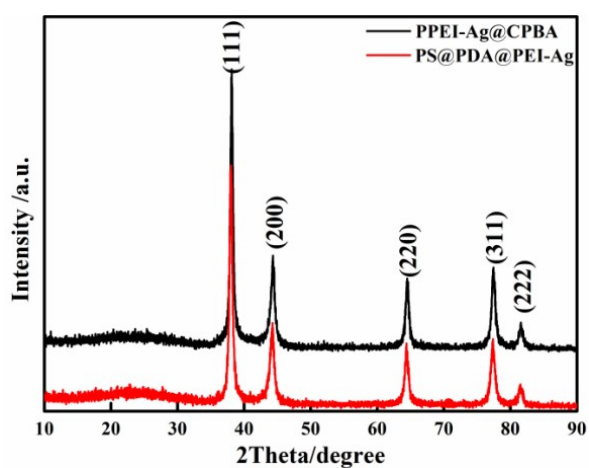

Fig. S4 XRD patterns of PPEI-Ag@CPBA and PS@PDA@PEI-Ag.

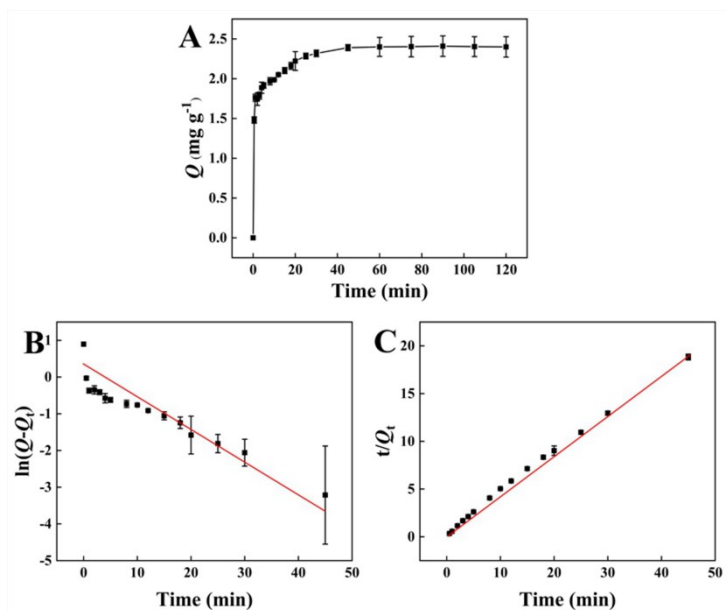

**Fig. S5** Adsorption kinetics model. Adsorption equilibrium time (A); Pseudo-first-order kinetic model fitting line (B); Pseudo-second-order model fitting line (C).

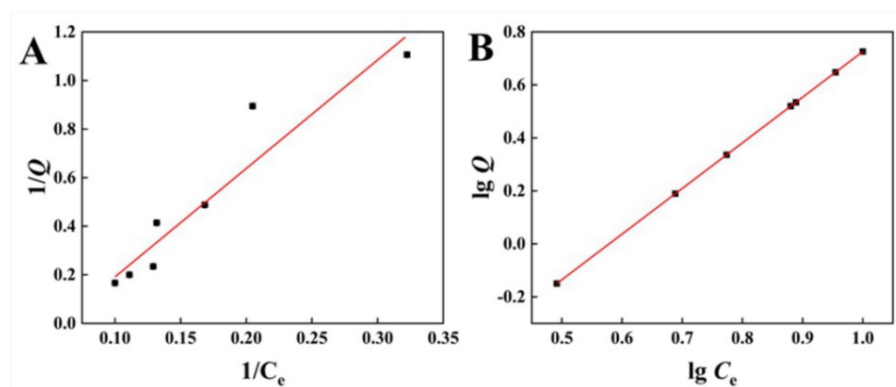

**Fig. S6** Isotherm adsorption model. Langmuir isotherm (A); Freundlich isotherm (B).

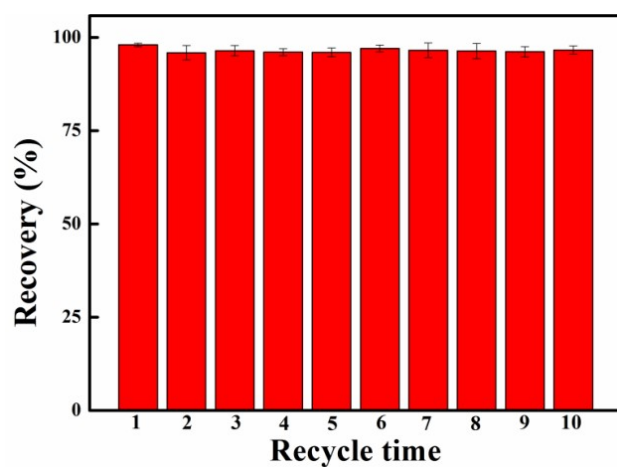

**Fig. S7** Reusability of PPEI-Ag@CPBA.

**Table S1** Kinetic parameters from adsorption of LTL onto PPEI-Ag@CPBA.

| Adsorbents   | pseudo-first-order equation          |                                      |                                 |                  | pseudo-second-order equation         |                                                  |       |                                                |                    |
|--------------|--------------------------------------|--------------------------------------|---------------------------------|------------------|--------------------------------------|--------------------------------------------------|-------|------------------------------------------------|--------------------|
|              | $Q_{e,e}^a$<br>(mg g <sup>-1</sup> ) | $Q_{e,c}^b$<br>(mg g <sup>-1</sup> ) | $k_1$<br>(L min <sup>-1</sup> ) | $R^2$            | $Q_{e,c}^b$<br>(mg g <sup>-1</sup> ) | $k_2$<br>(g mg <sup>-1</sup> min <sup>-1</sup> ) | $R^2$ | $h$<br>(mg g <sup>-1</sup> min <sup>-1</sup> ) | $t_{1/2}$<br>(min) |
| PPEI-Ag@CPBA | 2.41                                 | 2.40                                 | 0.065                           | $\frac{0.96}{4}$ | 2.49                                 | 0.105                                            | 0.999 | 1.54                                           | 3.83               |

<sup>a</sup> is the equilibrium adsorption amount from kinetic experiments.

<sup>b</sup> is the equilibrium adsorption amount calculated from kinetic equations.

**Table S2** Adsorption isotherm constants for PPEI-Ag@CPBA.

| Adsorption isotherm models | Langmiur equation |                                |                                 | Freundlich equation |                                                                    |       |
|----------------------------|-------------------|--------------------------------|---------------------------------|---------------------|--------------------------------------------------------------------|-------|
|                            | $R^2$             | $Q_m$<br>(mg g <sup>-1</sup> ) | $K_L$<br>(L min <sup>-1</sup> ) | $R^2$               | $K_F$<br>(g mg <sup>-1</sup> )(L mg <sup>-1</sup> ) <sup>1/n</sup> | $1/n$ |
| PPEI-Ag@CPBA               | 0.875             | 2.45                           | 0.056                           | 0.906               | 0.101                                                              | 1.72  |
